# Supplementary material for: Using graphene networks to build bioinspired self-monitoring ceramics
Source: PubMed Central journal article supplement (PMC5309856; doi:10.1038/ncomms14425), 2017-02-09
Supplement: ncomms14425-s1.pdf [file ncomms14425-s1.pdf]

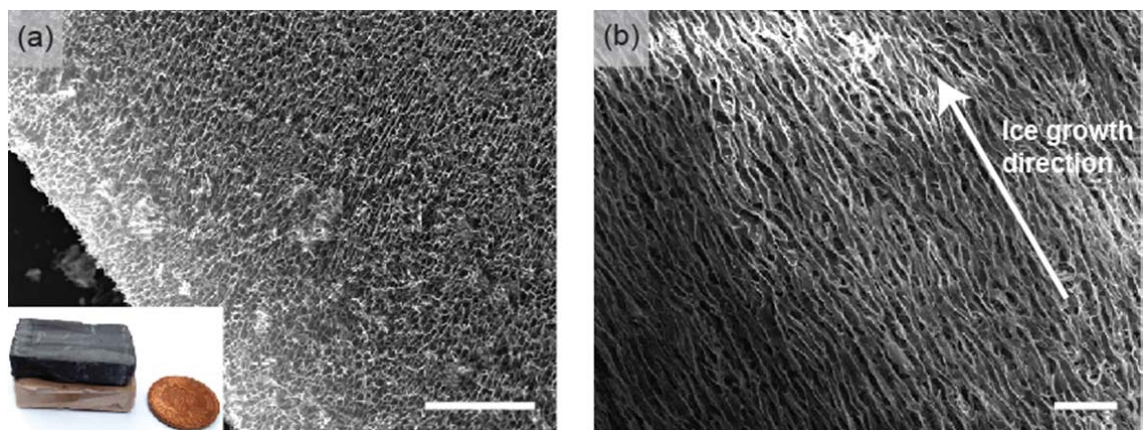

14

15 **Supplementary Figure 1. Low magnification images of the graphene network** in the directions (a)  
16 perpendicular and (b) parallel to the ice growth. The insert in (a) shows pictures of the foams before  
17 (bottom) and after (top) thermal reduction. Scale bars, 500  $\mu\text{m}$  (a), 100  $\mu\text{m}$  (b).

18

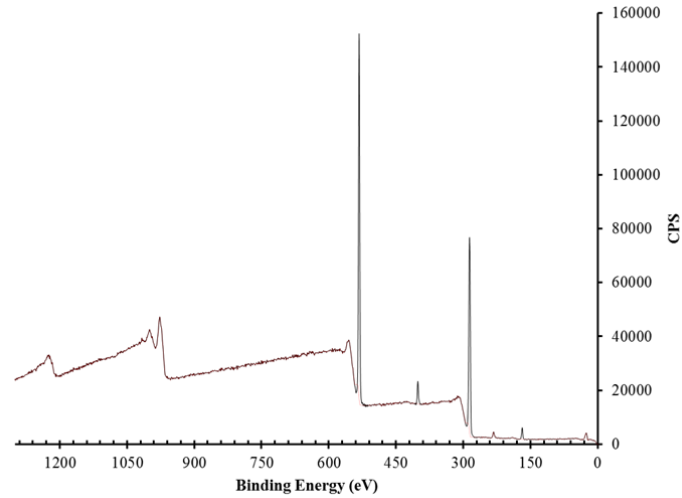

19

20 **Supplementary Figure 2. XPS survey of freeze dried CMG.** Atomic composition C1s (53.5%),  
21 N1s (3.5%), O1s(38.8%), S2p (4.2%). Sulphur and Nitrogen are attributed to the vacuum grease used  
22 during the freeze casting process while the small fraction of Sulphur can be a residue from the  
23 synthesis route.

24

25

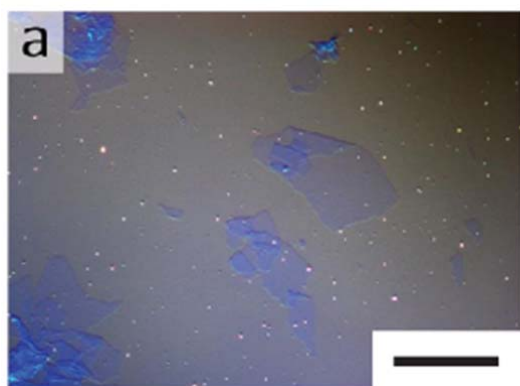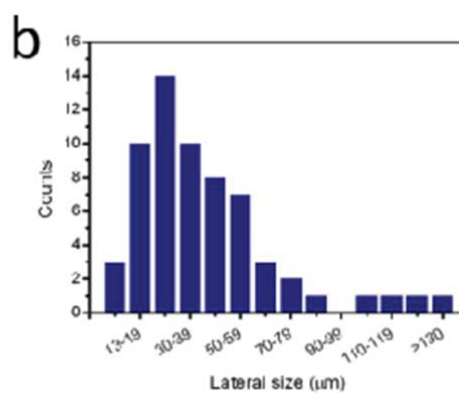

26

27 **Supplementary Figure 3. CMG flake size analysis.** (a) Optical microscope image of CMG flakes on  
28 Si/SiO<sub>2</sub> substrate obtained by differential interference contrast. (b) Lateral size distribution for 100  
29 CMG flakes. Scale bar, 50 μm (a).

30

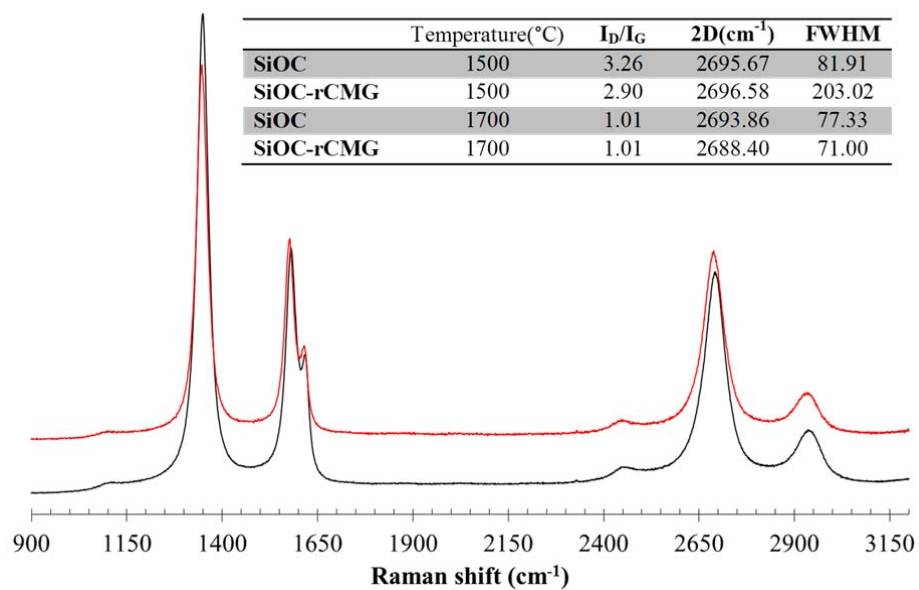

31

32 **Supplementary Figure 4. Raman study of SiOC-rCMG composites.** Raman spectra of pure matrix  
 33 SiOC (black) and composite (red) at 1700 °C. Inset table. Calculated Raman parameters at 1500 °C  
 34 and 1700 °C.

35

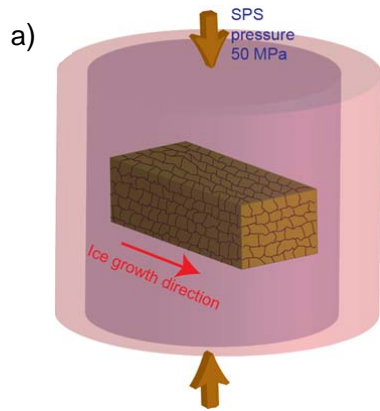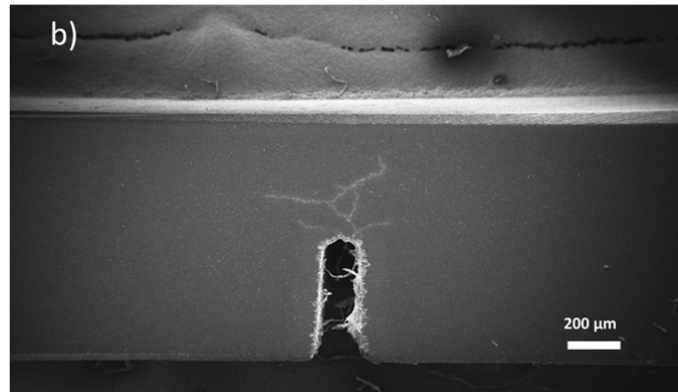

36

37 **Supplementary Figure 5. Spark Plasma Sintering layout and SENB dead-specimen micrograph.**

38 (a) Schematic illustration of the infused foams into the SPS graphite die and (b) notched sample  
39 micrograph after R-curve testing

40
